# Supplementary material for: L-shaped association between dietary coenzyme Q10 intake and high-sensitivity C-reactive protein in Chinese adults: a national cross-sectional study
Source: Royal Society of Chemistry journal article supplement (doi:10.1039/d3fo00978e), 2023-01-01
Supplement: d3fo00978e1.pdf [file d3fo00978e1.pdf]

**Supplemental Table 1.** Comparison of characteristics between participants with and without the exclusion of missing data.

| <b>Characteristics</b>               | <b>Participants with missing data</b> | <b>Participants without missing data</b> | <b><i>P</i> value</b> |
|--------------------------------------|---------------------------------------|------------------------------------------|-----------------------|
| Number of participants, <i>n</i>     | 9,600                                 | 7,953                                    |                       |
| Male, <i>n</i> (%)                   | 4,656 (48.5%)                         | 3,743 (47.1%)                            | 0.060                 |
| Age, years                           | 49.1 ± 15.4                           | 49.9 ± 14.8                              | 0.001                 |
| Height, cm                           | 161.3 ± 8.7                           | 161.1 ± 8.6                              | 0.212                 |
| Weight, kg                           | 60.7 ± 11.3                           | 60.7 ± 11.2                              | 0.889                 |
| BMI, kg/m <sup>2</sup>               | 23.3 ± 3.4                            | 23.3 ± 3.4                               | 0.429                 |
| The Han nationality, <i>n</i> (%)    | 8,385 (87.7%)                         | 7,030 (88.7%)                            | 0.043                 |
| Married, <i>n</i> (%)                | 7,774 (82.8%)                         | 6,686 (84.1%)                            | 0.021                 |
| Middle school or above, <i>n</i> (%) | 5,476 (58.4%)                         | 4,513 (56.7%)                            | 0.031                 |
| Smoking, <i>n</i> (%)                | 2,986 (31.8%)                         | 2,482 (31.2%)                            | 0.424                 |
| Drinking, <i>n</i> (%)               | 3,222 (34.3%)                         | 2,675 (33.6%)                            | 0.367                 |
| Physical activity, MET hours/week    | 59.5 [11.7, 168.5]                    | 54.4 [11.8, 169.3]                       | 0.888                 |
| The region, <i>n</i> (%)             |                                       |                                          | 0.437                 |
| North                                | 4,050 (42.6%)                         | 3,341 (42.0%)                            |                       |
| South                                | 5,456 (57.4%)                         | 4,612 (58.0%)                            |                       |
| Residence, <i>n</i> (%)              |                                       |                                          | 0.113                 |
| Urban                                | 3,171 (33.4%)                         | 2,562 (32.2%)                            |                       |
| Rural                                | 6,335 (66.6%)                         | 5,391 (67.8%)                            |                       |
| Urbanization index                   | 65.0 [50.9, 85.2]                     | 64.2 [50.8, 85.2]                        | 0.623                 |
| Energy, kcal/day                     | 2,158.6 ± 649.8                       | 2,167.2 ± 649.3                          | 0.386                 |
| Carbohydrate, g/day                  | 295.4 ± 101.7                         | 296.8 ± 101.7                            | 0.356                 |
| Fat, g/day                           | 74.2 ± 36.0                           | 74.5 ± 36.0                              | 0.561                 |
| Protein, g/day                       | 66.0 ± 22.9                           | 66.1 ± 22.7                              | 0.815                 |
| hsCRP, mg/L                          | 1.0 [0, 2.0]                          | 1.0 [0, 2.0]                             | 0.953                 |

| Characteristics          | Participants with missing data | Participants without missing data | <i>P</i> value |
|--------------------------|--------------------------------|-----------------------------------|----------------|
| Hb, g/L                  | 141.5 ± 20.6                   | 141.5 ± 20.6                      | 0.909          |
| WBC, 10 <sup>9</sup> /L  | 6.3 ± 2.0                      | 6.3 ± 2.0                         | 0.967          |
| RBC, 10 <sup>12</sup> /L | 4.7 ± 0.7                      | 4.7 ± 0.7                         | 0.937          |
| PLT, 10 <sup>9</sup> /L  | 213.0 ± 68.5                   | 212.9 ± 68.6                      | 0.889          |

For normally distributed continuous variables, the data were reported as means ± standard deviations. For non-normally distributed continuous variables, as medians [interquartile ranges]. For categorical variables, as n (%). CoQ10, coenzyme Q10; MET, metabolic equivalent; hsCRP, high-sensitivity C-reactive protein; Hb, hemoglobin; WBC, white blood cell count; RBC, red blood cell count; PLT, platelet count.

**Supplemental Table 2.** Linear regression associations between the quartiles of energy-adjusted dietary CoQ10 consumption and inflammatory markers.

|                              | Crude model          |                |                    | Adjusted model       |                |                    |
|------------------------------|----------------------|----------------|--------------------|----------------------|----------------|--------------------|
|                              | $\beta$ (95% CI)     | <i>P</i> value | <i>P</i> for trend | $\beta$ (95% CI)     | <i>P</i> value | <i>P</i> for trend |
| <b>hsCRP, mg/L</b>           |                      |                |                    |                      |                |                    |
| Q1                           | Ref                  |                | < 0.001            | Ref                  |                | 0.008              |
| Q2                           | -0.70 (-1.27, -0.13) | 0.017          |                    | -0.79 (-1.38, -0.21) | 0.008          |                    |
| Q3                           | -0.76 (-1.34, -0.19) | 0.009          |                    | -0.81 (-1.39, -0.23) | 0.007          |                    |
| Q4                           | -1.05 (-1.63, -0.48) | < 0.001        |                    | -0.82 (-1.40, -0.24) | 0.006          |                    |
| <b>WBC, 10<sup>9</sup>/L</b> |                      |                |                    |                      |                |                    |
| Q1                           | Ref                  |                | 0.910              | Ref                  |                | 0.880              |
| Q2                           | -0.05 (-0.17, 0.07)  | 0.421          |                    | 0 (-0.13, 0.12)      | 0.993          |                    |
| Q3                           | -0.06 (-0.19, 0.06)  | 0.319          |                    | -0.01 (-0.14, 0.11)  | 0.822          |                    |
| Q4                           | 0 (-0.13, 0.12)      | 0.955          |                    | -0.01 (-0.13, 0.12)  | 0.933          |                    |

The data were reported as  $\beta$  (95% CI). CoQ10 intervals were Q1 (< 2.18 mg/day), Q2 (2.18-4.07 mg/day), Q3 (4.07-6.92 mg/day), and Q4 ( $\geq$  6.92 mg/day). The nutrient residual model was used to calculate energy-adjusted dietary CoQ10 consumption. Sex, age, the highest level of education, region, total energy intake, physical activity, urbanization index, and alcohol and cigarette consumption were introduced into adjusted models. CoQ10, coenzyme Q10; hsCRP, high-sensitivity C-reactive protein; WBC, white blood cell count;  $\beta$ , beta; CI, confidence interval.

**Supplemental Table 3.** Linear regression associations between the quartiles of dietary CoQ10 consumption and inflammatory markers with further adjustment for BMI.

|                              | Adjusted model       |                |                    |
|------------------------------|----------------------|----------------|--------------------|
|                              | $\beta$ (95% CI)     | <i>P</i> value | <i>P</i> for trend |
| <b>hsCRP, mg/L</b>           |                      |                |                    |
| Q1                           | Ref                  |                | 0.022              |
| Q2                           | -0.96 (-1.51, -0.42) | < 0.001        |                    |
| Q3                           | -0.67 (-1.22, -0.12) | 0.017          |                    |
| Q4                           | -0.79 (-1.35, -0.22) | 0.007          |                    |
| <b>WBC, 10<sup>9</sup>/L</b> |                      |                |                    |
| Q1                           | Ref                  |                | 0.854              |
| Q2                           | -0.06 (-0.17, 0.06)  | 0.349          |                    |
| Q3                           | 0 (-0.12, 0.12)      | 0.972          |                    |
| Q4                           | -0.01 (-0.13, 0.12)  | 0.928          |                    |

The data were reported as  $\beta$  (95% CI). CoQ10 intervals by quartiles were Q1 (< 1.88 mg/day), Q2 (1.88-3.92 mg/day), Q3 (3.92-6.96 mg/day), and Q4 ( $\geq$  6.96 mg/day). BMI, sex, age, the highest level of education, region, total energy intake, physical activity, urbanization index, and alcohol and cigarette consumption were introduced into adjusted models. CoQ10, coenzyme Q10; BMI, body mass index; hsCRP, high-sensitivity C-reactive protein; WBC, white blood cell count;  $\beta$ , beta; CI, confidence interval.
